# Supplementary figures and images for: Melatonin Protects Chronic Kidney Disease Mesenchymal Stem/Stromal Cells against Accumulation of Methylglyoxal via Modulation of Hexokinase-2 Expression
Source: PubMed Central journal article supplement — Biomol Ther (Seoul). 2021 Jul 15;30(1):28–37. doi: 10.4062/biomolther.2021.058 (PMC8724841; doi:10.4062/biomolther.2021.058), 2021-07-15

**A**

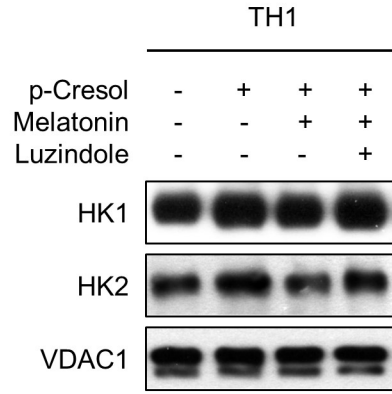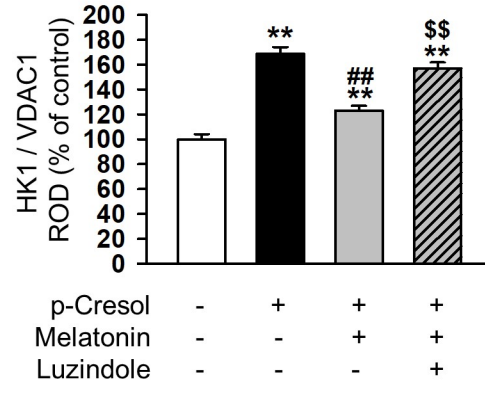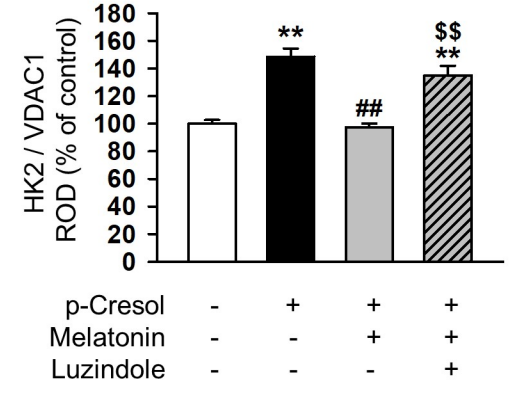

Supplement: bt-30-1-28-supple.pdf [file bt-30-1-28-supple.pdf]
